# Supplementary figures and images for: Monitoring for Metabolic Side Effects Among Outpatients With Dementia Receiving Antipsychotics
Source: Atypon-hosted journal article supplement (doi:10.1176/appi.ps.201300317), 2014-05-15

Figure 1: Patient Selection Flow Chart

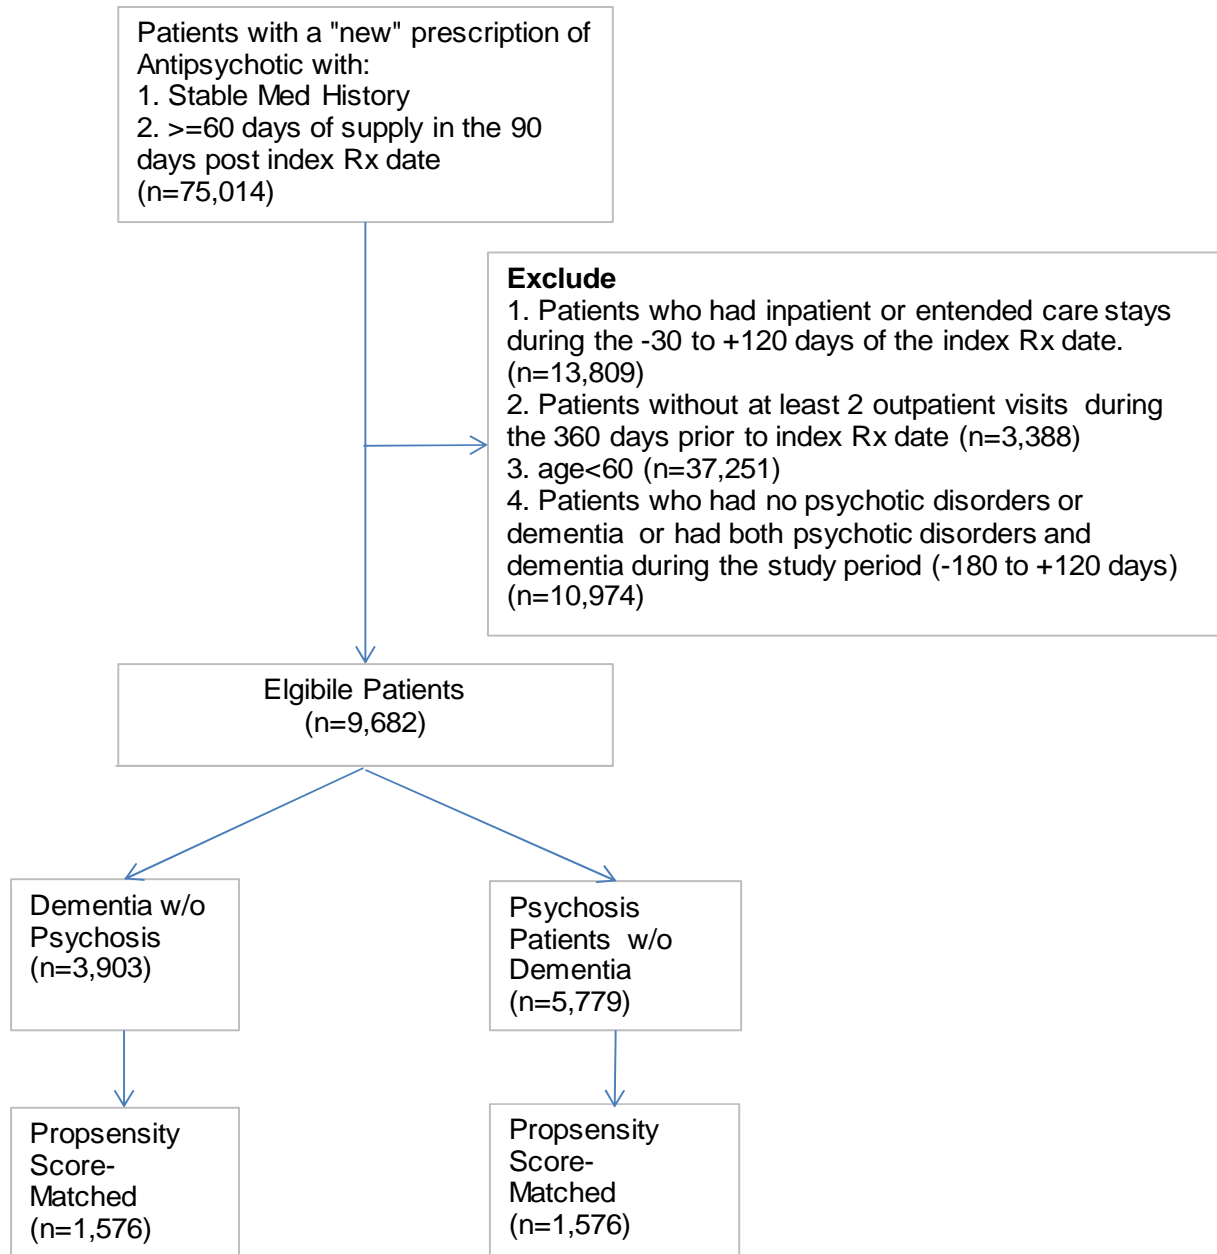

Supplement: 1147_ds001.pdf [file 1147_ds001.pdf]
